# Supplementary material
Source: Springer Nature journal article supplement (https://www.springermedizin.de/resource/supplementary/12955_2011_862_MOESM3_ESM.pdf/9561404)

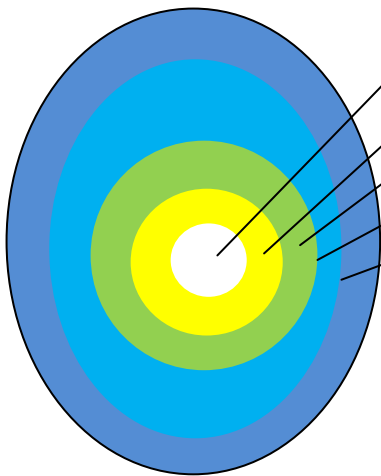

Spirit

Soul

Cognitive (mind)

Psycho-emotional (mind)

Physical (body)

Supplement: MOESM3 [file 9561404]
